# Supplementary material for: Suicidal Ideation in the Australian Construction Industry: Prevalence and the Associations of Psychosocial Job Adversity and Adherence to Traditional Masculine Norms
Source: MDPI journal article supplement (doi:10.3390/ijerph192315760), 2022-11-26
Supplement: s1 [file s1]

## Supplementary Materials

- 1) **Supplementary File S1. Psychosocial Job Adversity Questions**My job is more stressful than I had ever imagined
- 2) I fear the amount of stress in my job will make me physically ill
- 3) I get paid fairly for the things I do in my job
- 4) I have a secure future in my job
- 5) The company I work for will still be in business 5 years from now
- 6) I worry about the future of my job
- 7) My job is complex and difficult
- 8) My job often requires me to learn new skills
- 9) I use many of my skills and abilities in my current job
- 10) I have a lot of freedom to decide how I do my own work
- 11) I have a lot to say about what happens on my job
- 12) I have a lot of freedom to decide when I do my work

## Supplementary File S2. Conforming to Masculine Norms Inventory 22 Questions

- 1) My work/school is the most important part of my life
- 2) I make sure people do as I say
- 3) In general, I do not like risky situations
- 4) It would be awful if someone thought I was gay
- 5) I love it when men are in charge of women
- 6) I like to talk about my feelings
- 7) I would feel good if I had many sexual partners
- 8) It is important to me that people think I am heterosexual
- 9) I believe that violence is never justified
- 10) I tend to share my feelings
- 11) I should be in charge
- 12) I would hate to be important
- 13) Sometimes violent action is necessary
- 14) I don't like giving all my attention to work/school
- 15) More often than not, losing does not bother me
- 16) If I could, I would frequently change sexual partners
- 17) I never do things to be an important person
- 18) I never ask for help
- 19) I enjoy taking risks
- 20) Men and women should respect each other as equals
- 21) Winning is the most important thing
- 22) It bothers me when I have to ask for help
